# Supplementary material
Source: HighWire-hosted journal article supplement (https://www.eneuro.org/content/5/4/ENEURO.0129-18.2018)

**A**

*Pdfr Myc*

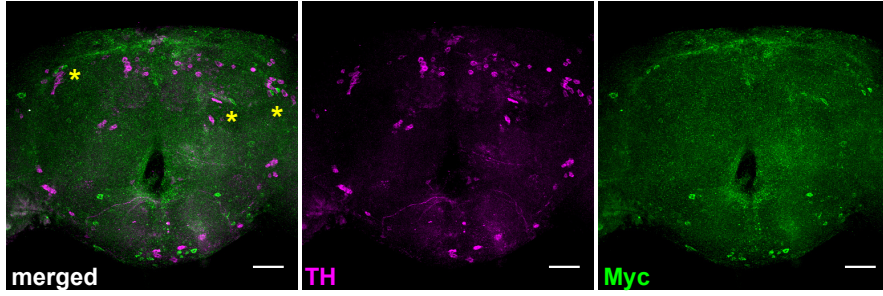

**B**

PPM3

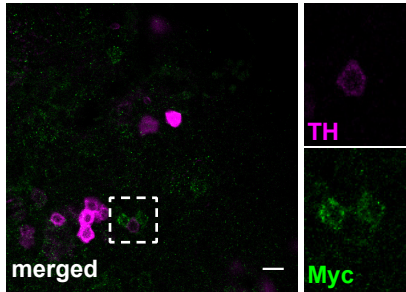

PPL1

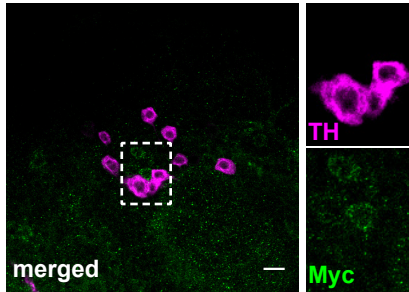

Supplement: inline-supplementary-material-9 [file inline-supplementary-material-9.pdf]
